# Supplementary material for: Novel PVA-Based Microspheres Co-Loaded with Photothermal Transforming Agent and Chemotherapeutic for Colorectal Cancer Treatment
Source: MDPI journal article supplement (doi:10.3390/pharmaceutics13070984), 2021-06-29
Supplement: s1 [file s1]

# Supplementary Materials: Novel PVA-Based Microspheres Co-Loaded with Photothermal Transforming Agent and Chemotherapeutic for Colorectal Cancer Treatment

Yao Zhang, Zirui He, Fan Yang, Changqing Ye, Xia Xu, Shige Wang, Ling Zhang and Duowu Zou

## 1. Calculation of photothermal conversion efficiency ( $\eta$ )

The  $\eta$  value of the microspheres was computed by a revised way similar to Korgel's report, where  $\eta$  can be calculated according to the following equation 1.

$$\eta = \frac{hS(T_{\max} - T_{\text{surr}}) - Q_{\text{in,surr}}}{I(1 - 10^{-A(\lambda)})} \quad (1)$$

In this equation,  $T_{\max}$  in the unit of  $^{\circ}\text{C}$  is the highest temperature that the microspheres reached during the laser irradiation and  $T_{\text{surr}}$  is the average temperature of ambient and  $Q_{\text{in,surr}}$  is the heat lost to the surroundings when performing the experiment.  $I$  in the unit of mW stands for the 808 nm laser power and  $A(\lambda)$  represents the absorbance value of microspheres at the wavelength of 808 nm.  $S$  is the surface area of the microspheres and the value of  $hS$  was determined by measuring temperature-dropping rate upon switching off the 808 nm NIR laser. So  $hS$  can be calculated according to the following equation 2.

$$hS = \frac{m \cdot C_{\text{H}_2\text{O}}}{\tau_s} \quad (2)$$

In this equation,  $m$  is the mass of the microspheres in units of g.  $C_{\text{H}_2\text{O}}$  is the specific heat capacity of water in the unit of  $\text{J} \cdot \text{g}^{-1} \cdot ^{\circ}\text{C}^{-1}$ .  $\tau_s$  is the time constant of the system which can be calculated according to the following equation 3.

$$t = -\tau_s \ln \theta = -\tau_s \ln \left( \frac{T - T_{\text{surr}}}{T_{\max} - T_{\text{surr}}} \right) \quad (3)$$

In this equation,  $t$  denotes the time in the cooling process (s).  $\theta$  refers to the thermal drive constant.  $T$  is the real-time temperature of time  $t$ . Thus the value of  $\tau_s$  was obtained by linearly fitting the negative value of the cooling time to the natural logarithm of the thermal drive constant.

## 2. Supplementary figures

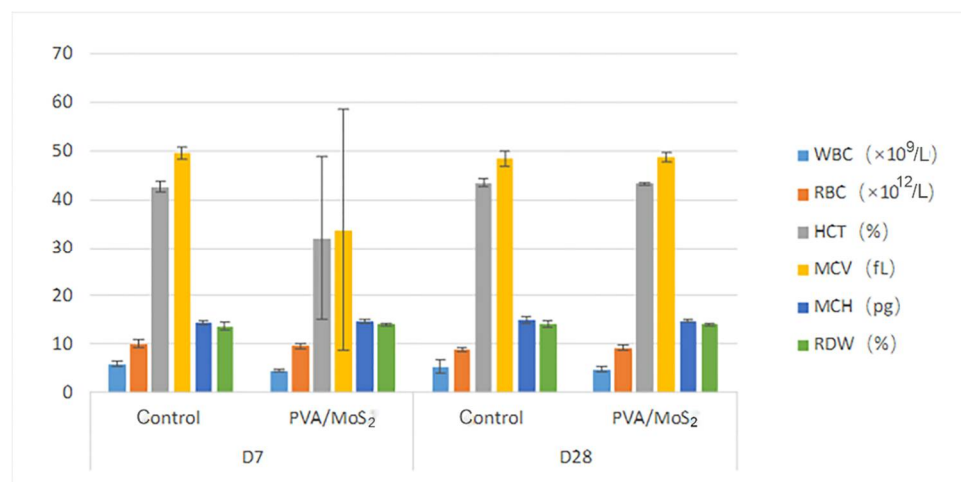

**Figure S1.** The routine blood parameters of healthy and treated mice. Treated mice are mice that were treated with PVA/MoS<sub>2</sub>/DOX microspheres. WBC: white blood cell; RBC: red blood cell; HCT: hematocrit; MCV: mean corpuscular volume; MCH: mean corpuscular hemoglobin; RDW: red cell distribution width.

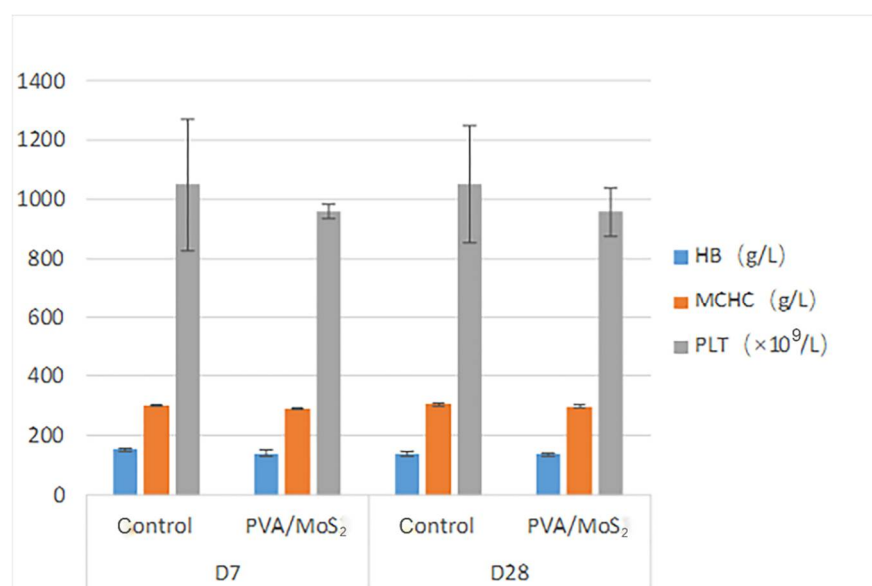

**Figure S2.** The routine blood parameters of healthy and treated mice. Treated mice are mice that were treated with PVA/MoS<sub>2</sub>/DOX microspheres. HB: hemoglobin; MCHC: mean corpuscular hemoglobin concentration; PLT: platelet.

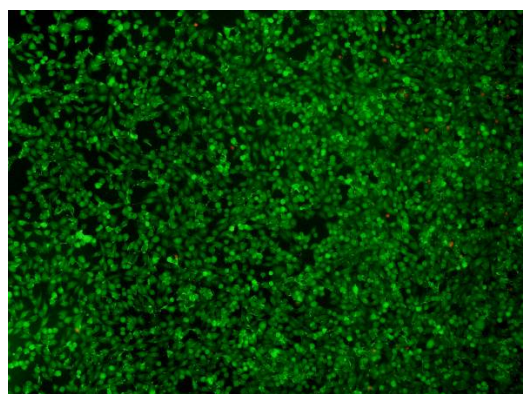

**Figure S3.** Dead/Live staining of cells in control group.
